# Supplementary material
Source: ML conference proceedings conference paper supplement (https://aclanthology.org/D17-1277)
Supplement: Attachment [file D17-1277.Attachment.pdf]

| Entity                             | Closest words sorted by cosine similarity                                                                                                                                                                                                                                                                                                                                                                                   |
|------------------------------------|-----------------------------------------------------------------------------------------------------------------------------------------------------------------------------------------------------------------------------------------------------------------------------------------------------------------------------------------------------------------------------------------------------------------------------|
| Japan national football team       | Japan player Shizuoka Yokohama played Asian USISL Saitama Okada Nakamura Tokyo Pele matches Japanese Korea players Tanaka soccer Chunnam game Suwon Takuya Kawaguchi Mizuno match Qatar team Eto Eiji football playing Confederations tournament Kagawa Chiba                                                                                                                                                               |
| Apple                              | apple fruit berry grape varieties apples crop pear potato blueberry strawberry growers peach orchards pears Prunus grower Rubus citrus spinosa tomato berries Blueberry peaches grapes almond juice melon bean apricot insect vegetable strawberries olive pomegranate Vaccinium cherries potatoes Strawberry plums cultivar Apples harvest figs cultivars sunflower beet                                                   |
| Apple Inc.                         | Apple software computer Microsoft Adobe hardware company iPod PC product Dell laptop Mac computers Macintosh Flash video desktop iPhone Digital Windows app PCs Intel technology device iTunes Motorola Sony digital Multimedia iPad HP licensing multimedia Nokia apps smartphone laptops Computer previewed products application Jobs devices startup                                                                     |
| Queen (band)                       | U2 band singer Avenged Rockers Coldplay concert Lynyrd Kiss Metallica Killers rerecorded song Beatles rock Stones recording Slash Singer touring musician music CD Dirty Moby rockers Sting Blackest songs rocker                                                                                                                                                                                                           |
| Germany                            | Germany Berlin German Munich Hamburg Austria Cologne Bavaria Hessen country Europe Wernigerode Saxony western Germans Schwaben Switzerland TuS Heilbronn Realschule Westfalen Deutschland Brandenburg eastern Rudolf Glarus Wolfgang Esslingen Kaserne Swabia Schwerin Andreas Poland Helmut Palatinate history Darmstadt Rhein Harald Ludwigsburg Kiel                                                                     |
| Barack Obama                       | Obama campaign President presidential endorsed Democrat Clinton nominee Presidential inauguration Senator senator administration speech Barack Democratic appointee Washington Republican vote Tuesday Secretary election Administration elect nomination Bush November president congressman Senate endorsing announcement candidacy                                                                                       |
| Leicestershire                     | curacy town Yeomanry Buckinghamshire Leicestershire Bedfordshire Lichfield Wiltshire Shropshire almshouses Lancashire Stonyhurst                                                                                                                                                                                                                                                                                            |
| Leicestershire County Cricket Club | Warwickshire batsman England Hampshire Leicestershire Trott Glamorgan Nottinghamshire Northants Lancashire Middlesex Essex Giles fielding Porterfield Test Surrey cricketer centurion Gough Bevan Sussex Gloucestershire bowled Worcestershire Tests Martyn Croft Derbyshire Clarke overs bowler Lancastrian played Northamptonshire Kent Vaughan Fletcher captaining internationals batting Gilchrist Notts batted cricket |

Table 8: Closest words to a given entity. Words with at least 500 frequency in the Wikipedia corpus are shown.
